# Supplementary material
Source: Springer Nature journal article supplement (https://www.springermedizin.de/resource/supplementary/12885_2012_4027_MOESM4_ESM.pdf/9465002)

**A**

XY

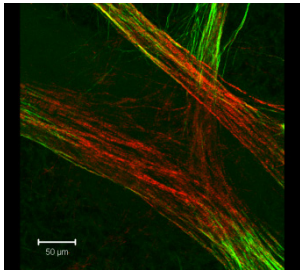

XZ

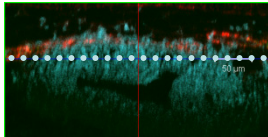

YZ

XY

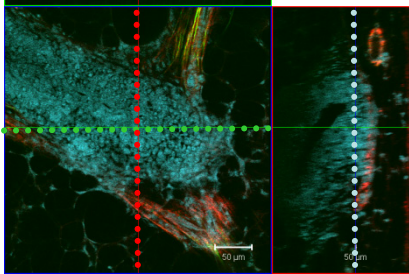**B**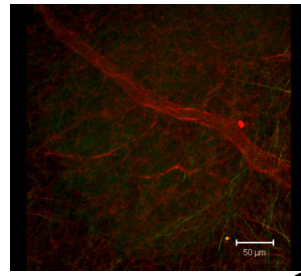SHG-B/  
SHG-F

Z = 0

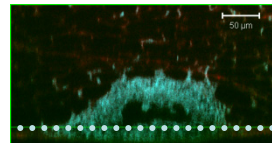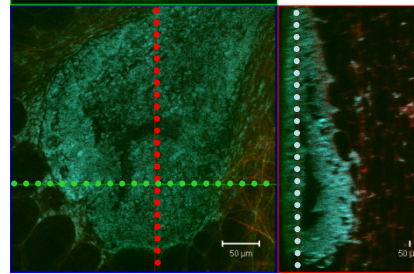SHG-B/  
CA/  
SHG-F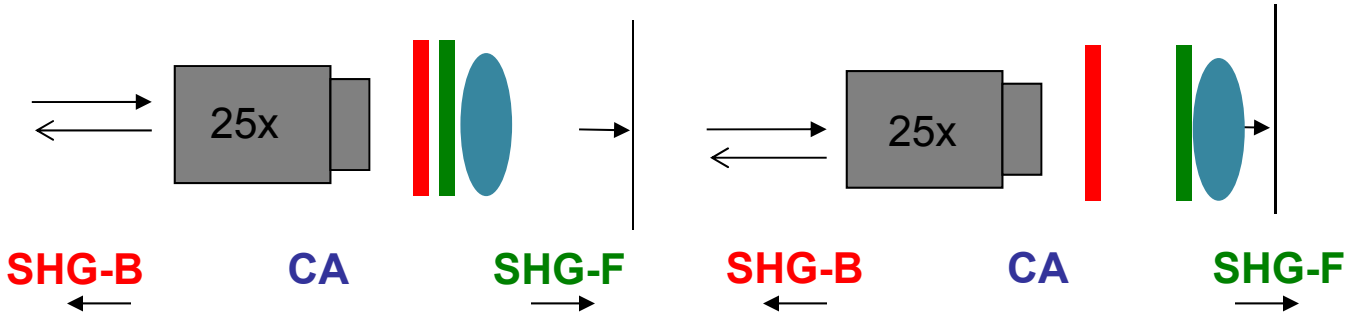**C**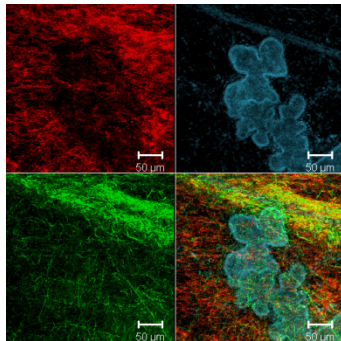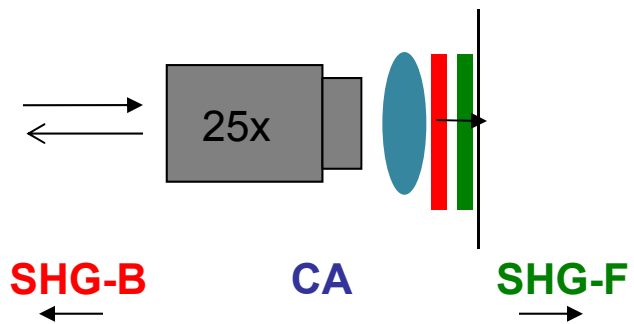

Supplement: MOESM4 [file 9465002]
